# Supplementary material
Source: PubMed Central journal article supplement (PMC7321023)
Supplement: mmc1.pdf [file mmc1.pdf]

**Cell, Volume 182**

**Supplemental Information**

**A Universal Design of Betacoronavirus Vaccines  
against COVID-19, MERS, and SARS**

**Lianpan Dai, Tianyi Zheng, Kun Xu, Yuxuan Han, Lili Xu, Enqi Huang, Yaling An, Yingjie Cheng, Shihua Li, Mei Liu, Mi Yang, Yan Li, Huijun Cheng, Yuan Yuan, Wei Zhang, Changwen Ke, Gary Wong, Jianxun Qi, Chuan Qin, Jinghua Yan, and George F. Gao**

**Table S1. Data collection and refinement statistics for MERS-CoV RBD-dimer, Related to Figure 2.**

|                                          | MERS-CoV RBD dimer                            |
|------------------------------------------|-----------------------------------------------|
| <b>Data collection</b>                   |                                               |
| Space group                              | P2 <sub>1</sub> 2 <sub>1</sub> 2 <sub>1</sub> |
| Wavelength (Å)                           | 0.97891                                       |
| Unit cell dimensions                     |                                               |
| a,b,c (Å)                                | 46.46, 108.79, 125.45                         |
| $\alpha,\beta,\gamma$ (°)                | 90, 90, 90                                    |
| Resolution (Å)                           | 50.00 – 2.90 (3.00 – 2.90)                    |
| Observed reflections                     | 14565 (1406)                                  |
| Completeness (%)                         | 99.9 (100.0)                                  |
| Redundancy                               | 5.9 (6.0)                                     |
| Rsym (%)                                 | 14.4 (84.7)                                   |
| Rpim (%)                                 | 8.4 (48.0)                                    |
| I/ $\sigma$ (I)                          | 9.6 (1.8)                                     |
| Wilson B factor                          | 46                                            |
| <b>Refinement</b>                        |                                               |
| No. reflections                          | 13671                                         |
| R <sub>work</sub> /R <sub>free</sub> (%) | 22.93 / 26.04                                 |
| No. atoms                                |                                               |
| Protein                                  | 3209                                          |
| Ligands                                  | 0                                             |
| Water                                    | 0                                             |
| B-factors (Å <sup>2</sup> )              |                                               |
| Protein                                  | 52                                            |
| Ligands                                  |                                               |
| Water                                    |                                               |
| r.m.s. deviation                         |                                               |
| Bond lengths (Å)                         | 0.005                                         |
| Bond angles (°)                          | 0.884                                         |
| Ramachandran plot                        |                                               |
| Favoured (%)                             | 98.05                                         |
| Allowed (%)                              | 1.95                                          |
| Outliers (%)                             | 0.00                                          |

<sup>a</sup>Values in parentheses are for highest-resolution shell.

**Table S2. Binding affinities of hACE2 to SARS-CoV-2 RBDs measured by SPR, Related to Figure 3.**

|                                      |          | <b>K<sub>D</sub> (nM)</b> |                             |
|--------------------------------------|----------|---------------------------|-----------------------------|
|                                      |          | Mammalian-expressed hACE2 | Baculovirus-expressed hACE2 |
| Mammalian-expressed SARS-CoV-2 RBD   | sc-dimer | 1.86 (1.98)*              | 215 (206)                   |
|                                      | Monomer  | 1.20 (1.03)               | 186 (187)                   |
| Baculovirus-expressed SARS-CoV-2 RBD | Monomer  | 4.04 (4.54)               | 184 (187)                   |

\*Values in parentheses are K<sub>D</sub> values by experimental repeat

**Table S3. Binding affinities of hACE2 to SARS-CoV RBDs measured by SPR, Related to Figure 4.**

|                                    |          | <b>K<sub>D</sub> (nM)</b> |                             |
|------------------------------------|----------|---------------------------|-----------------------------|
|                                    |          | Mammalian-expressed hACE2 | Baculovirus-expressed hACE2 |
| Mammalian-expressed SARS-CoV RBD   | sc-dimer | 8.75 (8.37)*              | 2040 (1980)                 |
|                                    | Monomer  | 14.2 (14.3)               | 2220 (2190)                 |
| Baculovirus-expressed SARS-CoV RBD | Monomer  | 12.3 (12.4)               | 1370 (1300)                 |

\*Values in parentheses are K<sub>D</sub> values by experimental repeat
